# Supplementary material for: Immunomodulatory Effect of Epidermal Growth Factor Secreted by Human Umbilical Cord Blood-Derived Mesenchymal Stem Cells on Atopic Dermatitis
Source: PubMed Central journal article supplement — Int J Stem Cells. 2022 Feb 28;15(3):311–23. doi: 10.15283/ijsc21173 (PMC9396020; doi:10.15283/ijsc21173), 2022-02-28
Supplement: ijsc-15-3-311-supple.pdf [file ijsc-15-3-311-supple.pdf]

**Table S1.** List of primer sequences for quantitative real-time PCR

| Species | Name  | Forward                  | Reverse                  |
|---------|-------|--------------------------|--------------------------|
| Human   | IL1b  | CTCCGGGACTCACAGCAAAA     | CAACACGCAGGACAGGTACA     |
|         | TNFa  | GCTCAGACATGTTTTCCGTG     | AGCAATGAGTGACAGTTGGT     |
|         | TARC  | CACGCAGCTCGAGGGACCAATGTG | TCAAGACCTCTCAAGGCTTGCAGG |
|         | GAPDH | ACCCACTCCTCCACCTT GA     | CTGTTGCTGTAGCCAAAT TCG   |
| Mouse   | TNFa  | TCAAACCCTGGATGAGCCC      | ACCCATTCCTTCACAGAGC      |
|         | TARC  | CAAGTCATCTGTGCAGACC      | CGCCTGTAGTGATAAGAGTCC    |
|         | IL4   | TCAACCCCAAGCTAGTTGTC     | TGTTCTTCGTTGCTGTGAGG     |
|         | IL22  | ATGAGTTTTCCCTTATGGGGAC   | GCTGGAAGTTGGACACCTCAA    |
|         | GAPDH | TGGTGAAGCAGGCATCTGAG     | TGAAGTCGCAGGAGACAACC     |
